# Supplementary material
Source: PubMed Central journal article supplement (PMC4515958)
Supplement: NIHMS707389-supplement-supplement_1.pdf [file NIHMS707389-supplement-supplement_1.pdf]

**SUPPLEMENTAL FIGURE 1**

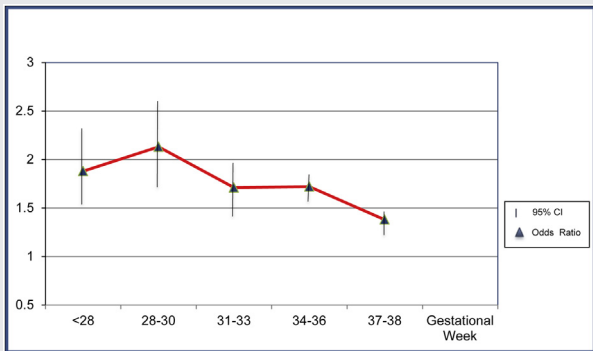

Odds ratio estimates for preterm/early term birth (<39 weeks) by gestational age for primiparous ART users with female infertility diagnosis.

*Dunietz. Assisted conception and preterm birth. Fertil Steril 2015.*
